# Supplementary material
Source: publisher site journal article supplement (https://www.dovepress.com/article/430502)
Supplement: Supplementary file 1 [file get_supplementary_file.php]

**Supplemental Information File**

**Supplemental Figures**


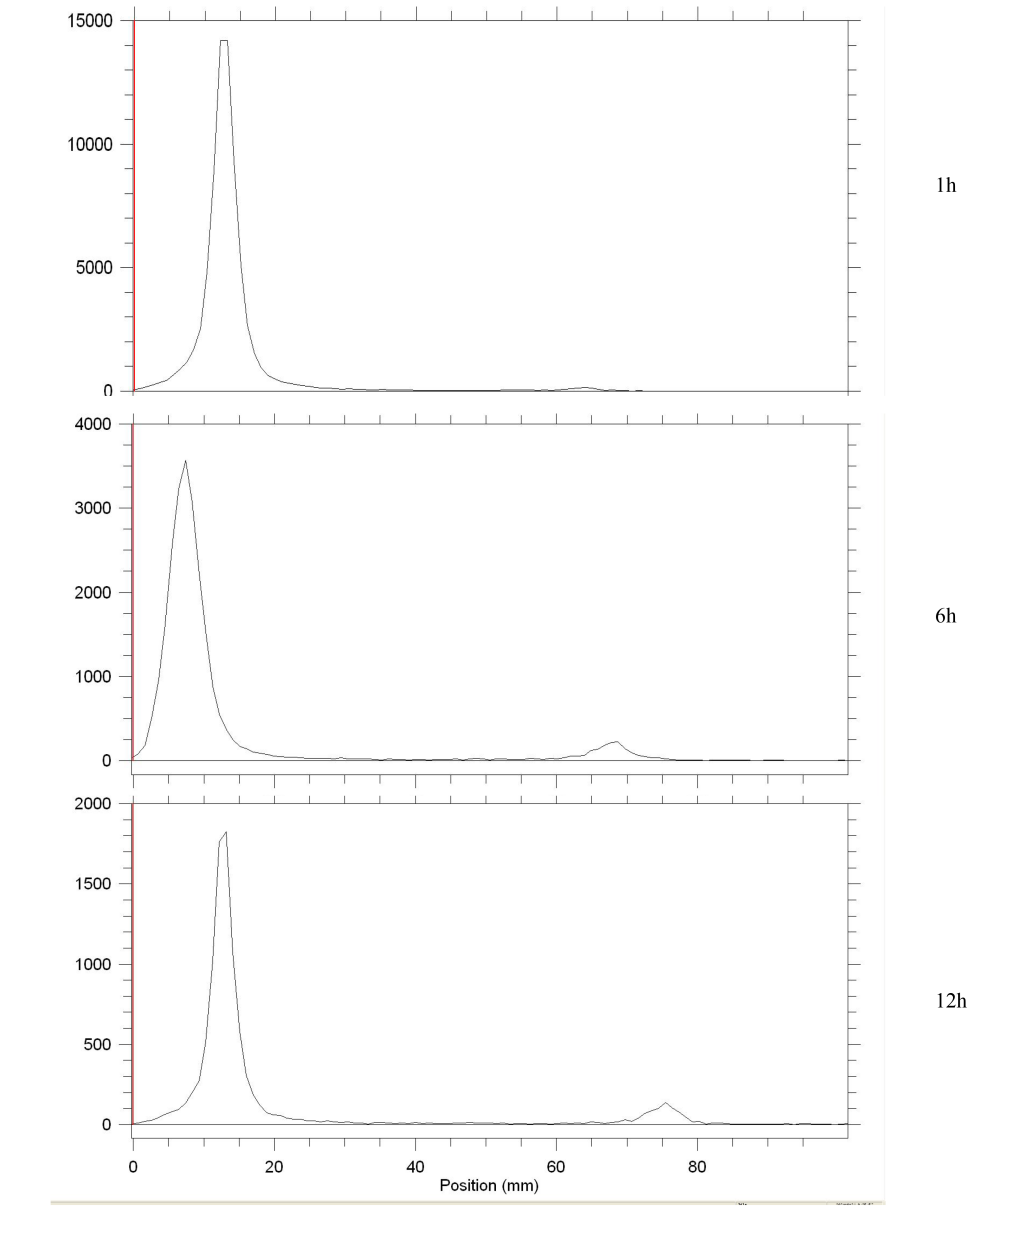


**Figure S1**. *In vitro* stability of 99mTc-ICG-HSA NPs in fetal bovine serum.

**
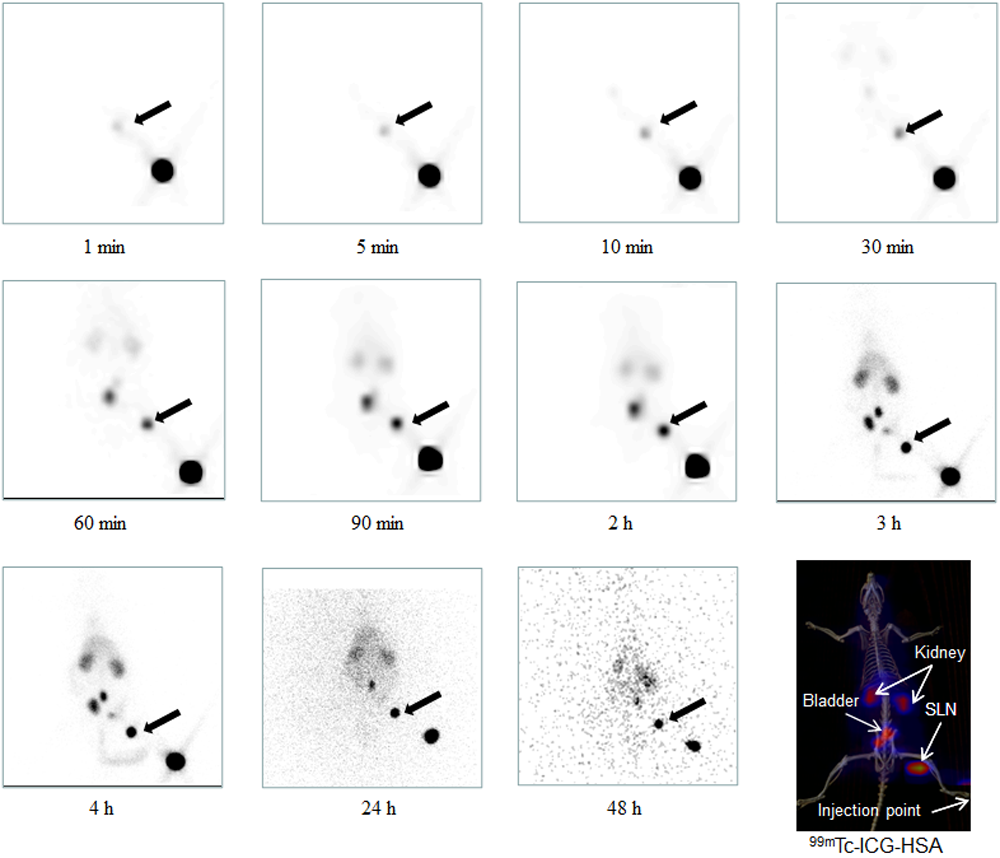
**

**Figure S2.** Longitudinal planar and SPECT/CT images after injection of 99mTc-ICG-HSA NPs in left rear pad of a SD rat and the SPECT/CT fusion image of 99mTc-ICG-HSA NPs after plantar injection for 1 h.

**
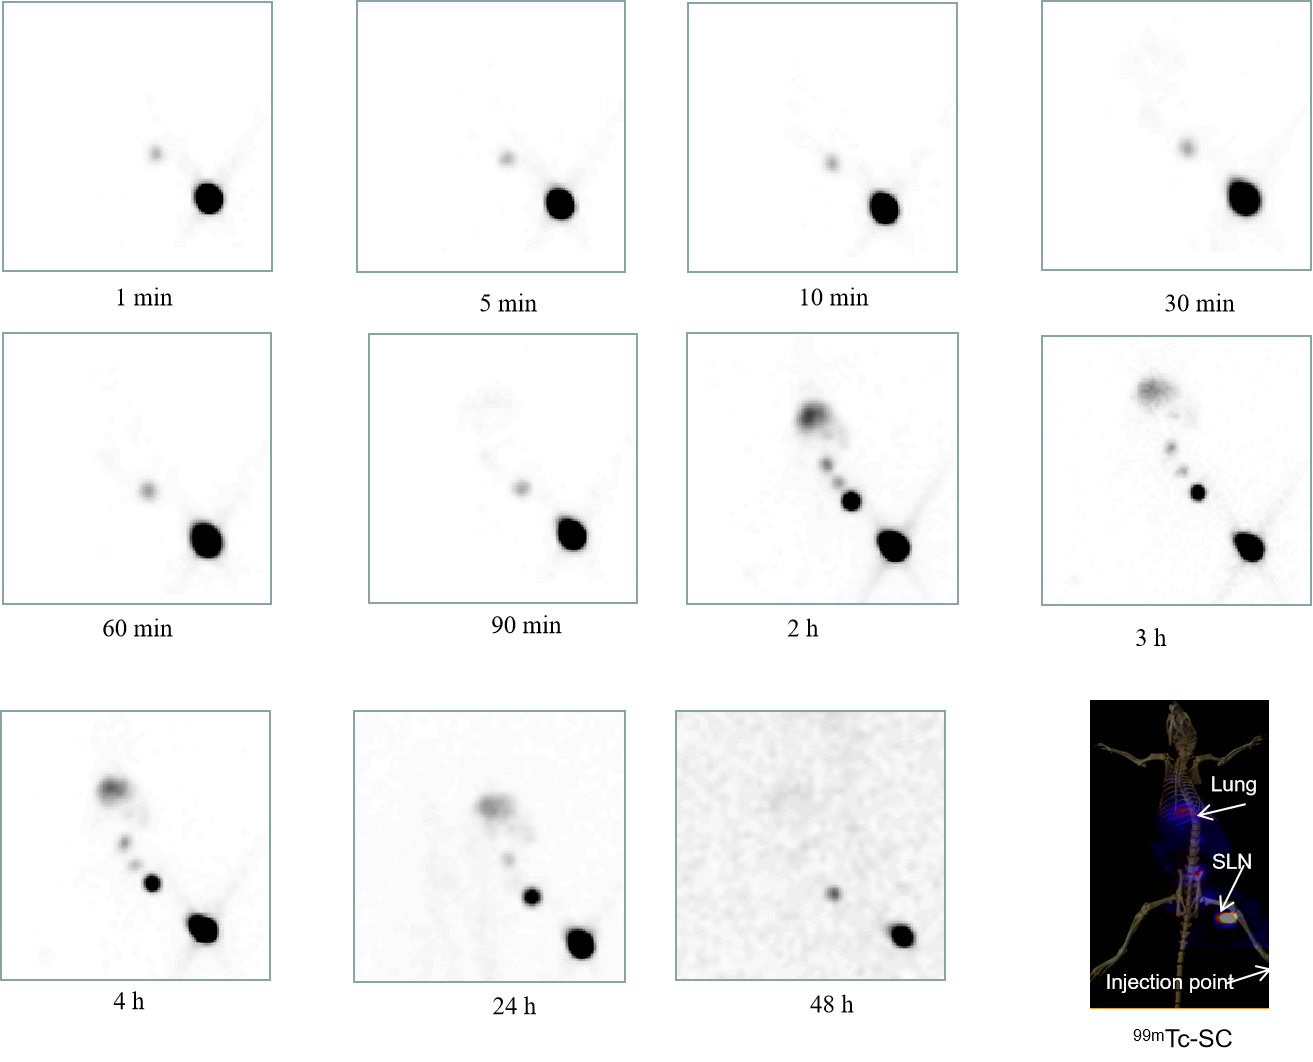
**

**Figure S3**. Longitudinal planar and SPECT/CT images after injection of 99mTc-SC in left rear pad of a SD rat and the SPECT/CT fusion image of 99mTc-SC NPs after plantar injection for 1 h.

**
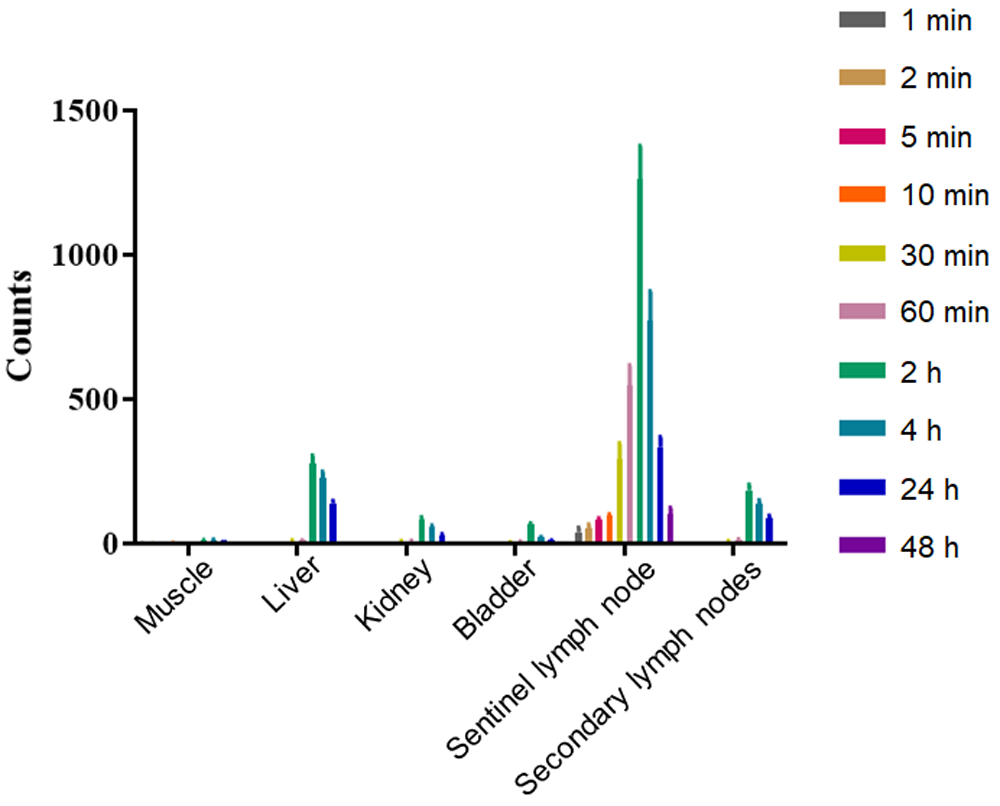
Figure S4**. Biodistribution of 99mTc-SC in major organs and tissues of rats. N = 3 in each group.

**Table S1**. Organ observed doses and whole-body effective doses

| Target organ | Absorbed Dose (mGy/MBq, Mean ± SD) | |
| --- | --- | --- |
| Adrenals | **8.50E-03** | **5.47E-04** |
| Brain | **4.53E-03** | **1.32E-04** |
| Breasts | **3.61E-03** | **7.32E-05** |
| Gallbladder Wall | **8.56E-03** | **5.25E-04** |
| LLI Wall | **5.68E-03** | **1.88E-04** |
| Small Intestine | **6.41E-03** | **1.30E-04** |
| Stomach Wall | **6.27E-03** | **6.38E-05** |
| ULI Wall | **8.95E-03** | **9.00E-04** |
| Heart Wall | **5.66E-03** | **1.04E-04** |
| Kidneys | **3.94E-02** | **8.12E-03** |
| Liver | **1.25E-02** | **1.72E-03** |
| Lungs | **6.15E-03** | **3.30E-04** |
| Muscle | **3.69E-03** | **2.28E-04** |
| Ovaries | **5.97E-03** | **1.25E-04** |
| Pancreas | **7.99E-03** | **3.01E-04** |
| Red Marrow | **4.85E-03** | **2.87E-05** |
| Osteogenic Cells | **1.28E-02** | **2.16E-04** |
| Skin | **2.20E-03** | **9.48E-04** |
| Spleen | **9.27E-03** | **2.12E-04** |
| Thymus | **4.73E-03** | **1.51E-04** |
| Thyroid | **3.98E-03** | **1.72E-04** |
| Urinary Bladder Wall | **5.36E-03** | **2.41E-04** |
| Uterus | **5.74E-03** | **1.59E-04** |
| Total Body | **5.39E-03** | **1.25E-05** |
| Effective Dose (mSv/MBq) | **6.51E-03** | **2.41E-04** |
